# Supplementary material
Source: publisher figshare collection journal article supplement (https://acs.figshare.com/ndownloader/files/14569982)
Supplement: Supplementary file 1 [file 14569982]

# Supporting Information

## Electrically Conducting and Mechanically Strong Graphene-Polylactic Acid Composites for 3D Printing

Mirae Kim<sup>1,+</sup>, Jae Hwan Jeong<sup>1,+</sup>, Jong-Young Lee<sup>1</sup>, Andrea Capasso<sup>1</sup>, Francesco Bonaccorso<sup>2</sup>, Seok-Hyeon Kang<sup>1</sup>, Young-Kook Lee<sup>1</sup> and Gwan-Hyoung Lee<sup>1\*</sup>

<sup>1</sup> Department of Materials Science and Engineering, Yonsei University, Seoul 03722, Korea

<sup>2</sup> Istituto Italiano di Tecnologia, Graphene Labs, I-16163 Genova, Italy

<sup>+</sup> *These authors contributed equally.*

\*E-mail: gwanlee@yonsei.ac.kr

Table S1. Mechanical and electrical properties of GNP-PLA composite from various researches

| Filler <sup>a</sup> | Elastic modulus <sup>b</sup> | Tensile strength <sup>b</sup> | Elongation at break <sup>b</sup> | Percolation threshold | Electric Conductance | Methods                                                   | Ref.      |
|---------------------|------------------------------|-------------------------------|----------------------------------|-----------------------|----------------------|-----------------------------------------------------------|-----------|
| GNP (2wt%)          | -8%                          | 44.1%                         | 56.7%                            | 1.49 vol%             | 1mS/cm (5 wt%)       | Liquid exfoliated GNP Solution blending                   | This work |
| GNP (0.3wt%)        | -50%                         | 26.5%                         | 60.6%                            | -                     | -                    | Commercial GNP Melt blending into PLA/EPO <sup>c</sup>    | 1         |
| GNP (1wt%)          | -                            | 39.6%                         | -85%                             | -                     | -                    | Sonicating liquid exfoliation Solution blending           | 2         |
| GNP                 | -                            | -                             | -                                | 4.5 vol%              | 1S/cm (10 wt%)       | Commercial GNP Solution blending                          | 3         |
| rGO                 | -                            | -                             | -                                | 0.4 vol%              | 1S/cm (2 wt%)        | Commercial GNP Solution blending                          | 3         |
| GNP (7wt%)          | 17.3%                        | 14.1%                         | -33%                             | <7 wt%                | 0.1S/cm (7 wt%)      | Commercial GNP Melt blending                              | 4         |
| GNP (7wt%)          | 50.1%                        | 8.1%                          | -75.9%                           | <7 wt%                | 50uS/cm (7 wt%)      | Commercial GNP Melt blending                              | 4         |
| GNP (1wt%)          | 23.3%                        | 12.9%                         | -16%                             | 4 wt%                 | 0.1uS/cm (7 wt%)     | Rapid thermal expansion of acid treated GNP Melt blending | 5         |
| GNP (1wt%)          | 6.7%                         | 0%                            | -8%                              | 13 wt%                | 0.1uS/cm (15wt%)     | Commercial GNP Melt blending                              | 5         |
| GNP (10wt%)         | 34%                          | 29%                           | -11.5%                           | -                     | 40mS/cm (10wt%)      | Commercial composite                                      | 6         |

<sup>a</sup> concentration for measure mechanical property

<sup>b</sup> increment percentage compared with properties of pure PLA without filler.

<sup>c</sup> composite with PLA and epoxidized palm oil (EPO).

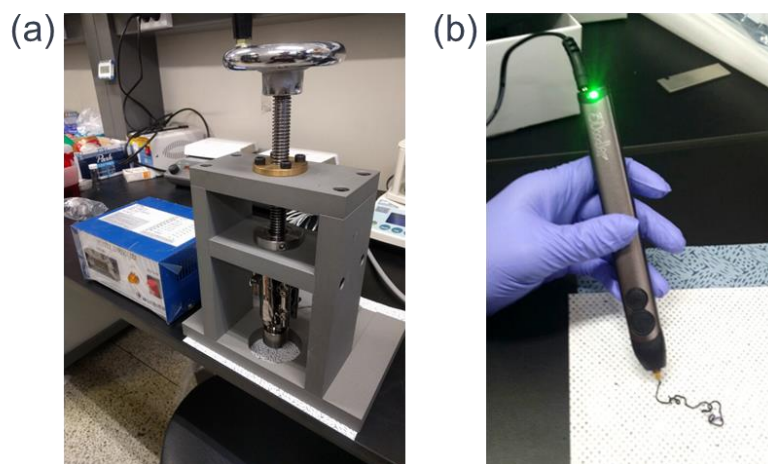

**Figure S1.** (a) Home-built extruder for constructing a GNP-PLA composite filament. The cylinder of the extruder was heated at 120 °C to slightly melt down the composite. The viscous composite was extruded through a nozzle with a diameter of 0.7 mm, followed by air cooling. (b) 3D printing pen used for this work (3Doodler Create+).

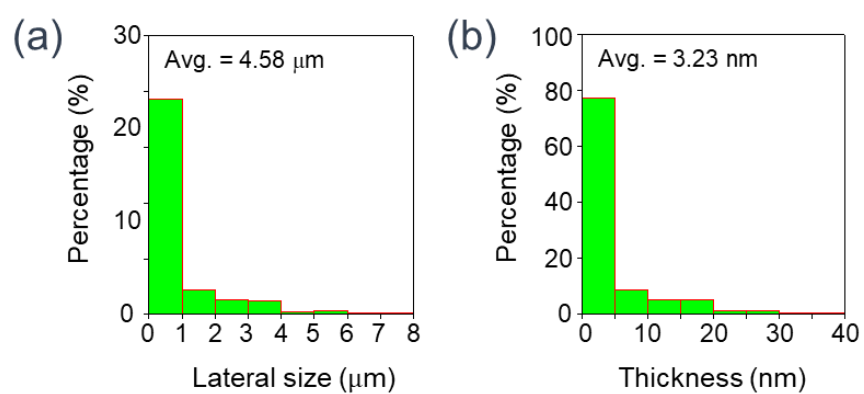

**Figure S2.** (a) Lateral size and (b) thickness distributions of the GNPs measured by AFM.

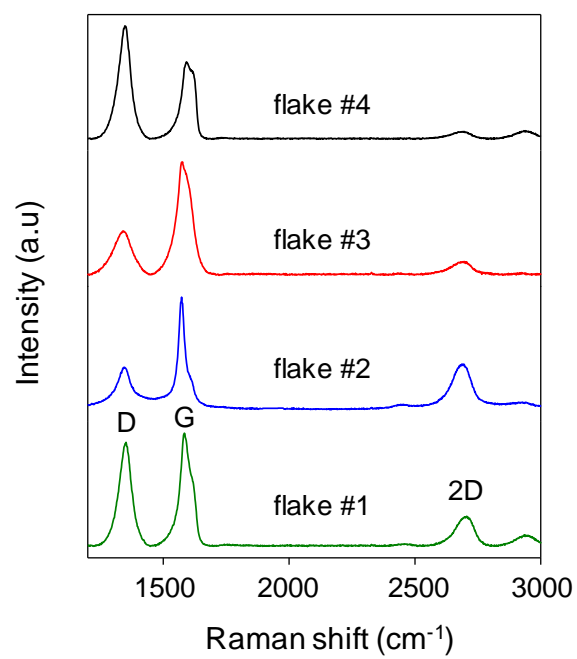

**Figure S3.** Raman spectra obtained from different graphene flakes.

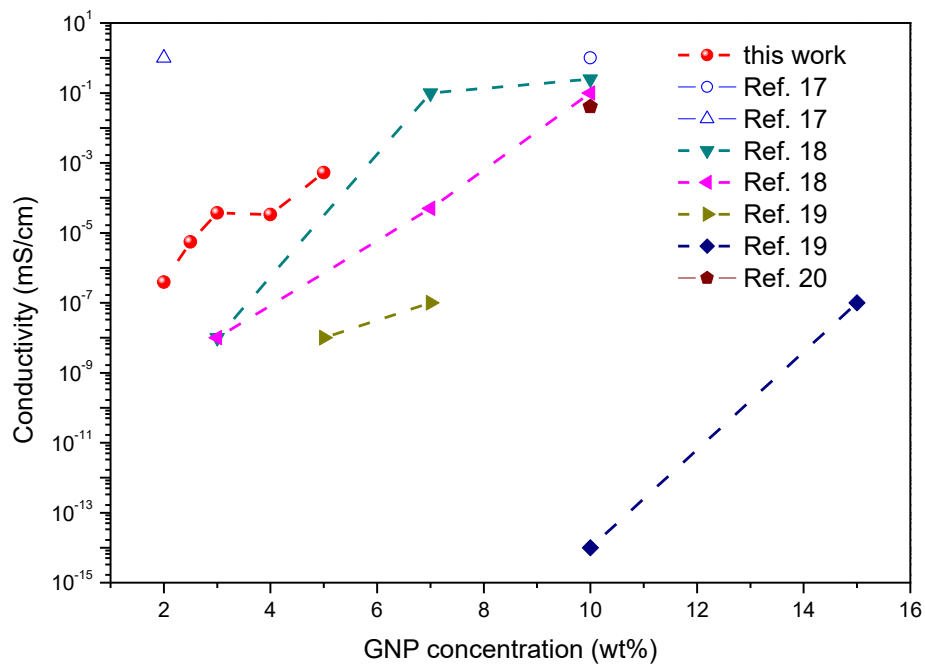

**Figure S4.** Electrical properties of GNP-PLA composite over GNP concentration, from various researches. Blank symbols are results without mechanical strength data.

- (1) Chieng, B. W.; Ibrahim, N. A.; Yunus, W. M.; Hussein, M. Z.; Giita Silverajah, V. S. Graphene nanoplatelets as novel reinforcement filler in poly(lactic acid)/epoxidized palm oil green nanocomposites: mechanical properties. *Int J Mol Sci* **2012**, *13*, 10920-10934.
- (2) Li, X.; Xiao, Y.; Bergeret, A.; Longerey, M.; Che, J. Preparation of polylactide/graphene composites from liquid-phase exfoliated graphite sheets. *Polymer Composites* **2014**, *35*, 396-403.
- (3) Sabzi, M.; Jiang, L.; Liu, F.; Ghasemi, I.; Atai, M. Graphene nanoplatelets as poly(lactic acid) modifier: linear rheological behavior and electrical conductivity. *Journal of Materials Chemistry A* **2013**, *1*, 8253-8261.
- (4) Gao, Y.; Picot, O. T.; Bilotti, E.; Peijs, T. Influence of filler size on the properties of poly(lactic acid) (PLA)/graphene nanoplatelet (GNP) nanocomposites. *European Polymer Journal* **2017**, *86*, 117-131.
- (5) Kim, I.-H.; Jeong, Y. G. Polylactide/exfoliated graphite nanocomposites with enhanced thermal stability, mechanical modulus, and electrical conductivity. *Journal of Polymer Science Part B: Polymer Physics* **2010**, *48*, 850-858.
- (6) Prashantha, K.; Roger, F. Multifunctional properties of 3D printed poly(lactic acid)/graphene nanocomposites by fused deposition modeling. *Journal of Macromolecular Science, Part A* **2016**, *54*, 24-29.
